# Supplementary material
Source: ML conference proceedings conference paper supplement (https://openreview.net/forum?id=sw0bT4z9FN)
Supplement: supplementary_material [file Appendix.pdf › Appendix.pdf]

## A Missing Proofs Related to Strategic Behavior

The following statement characterizes action  $x$  as a function of  $z$  and the prediction rule, where  $x$  is the observed attributes vector by the algorithm.

**Lemma 3** (Strategic Action). *Consider the following utility structure for agents, where  $\|v_t\| = 1$ . Each agent receives a value of 1 if classified as positive and 0 otherwise, and pays a cost of  $c$  per unit of movement (manipulation). The agent's utility is defined as the value received minus the cost incurred. Under the prediction rule defined above:*

1. If  $z_t \cdot v_t < 0$ , the agent does not move and is classified negative.
2. If  $0 \leq z_t \cdot v_t < 1/c$ , the agent moves in the direction of  $v_t$  to a point where  $x_t \cdot v_t = 1/c$ , and is classified positive.
3. If  $1/c \leq z_t \cdot v_t$ , the agent does not move and is classified positive.

*Proof.* Using the prediction rule in [Algorithm 2](#), an agent with observed vector  $x$  is classified as positive iff  $v_t \cdot x \geq 1/c$ . We analyze the utility-maximizing behavior of agents under the given utility structure in [Section 2](#). The utility of an agent is defined as:

$$\text{Utility}(x) = \begin{cases} 1 - c\|x - z_t\| & \text{if } v_t \cdot x \geq \frac{1}{c}, \\ -c\|x_t - z_t\| & \text{otherwise.} \end{cases}$$

As implied from Observation 1 in [Ahmadi et al. \[2021\]](#), the agent with attributes vector  $z_t$  only manipulates iff by movement cost at most  $c$  can be classified as positive. We now analyze the three cases: (i) If  $z_t \cdot v_t < 0$ , any movement incurs negative utility, so the agent does not move. (ii) If  $0 \leq z_t \cdot v_t < 1/c$ , the agent maximizes utility by moving to  $x \cdot v_t = 1/c$  in direction  $v_t$ , i.e.,

$$x = z_t + (1/c - z_t \cdot v_t) \cdot v_t.$$

This is the minimum manipulation cost to be classified as positive. (iii) Finally, if  $z_t \cdot v_t \geq 1/c$ , the agent already achieves maximum utility without moving.  $\square$

**Corollary 4.** *The prediction rule  $\mathbb{1}[x \cdot v \geq 1/c]$  classifies all  $z$  such that  $z \cdot v \geq 0$  as +1 and all  $z$  such that  $z \cdot v < 0$  as -1.*

In a nonstrategic setting, the difference in the error rate of two prediction rules can be related to the angles of their normal vectors.

**Lemma 5** ([Yan and Zhang \[2017\]](#)). *In the nonstrategic setting, for any unit-sized vector  $v_1$  and  $v_2$  and prediction rules  $\mathbb{1}[z \cdot v_i \geq 0]$ ,*

$$|\text{err}(v_1) - \text{err}(v_2)| \leq \mathbb{P}[\mathbb{1}[z \cdot v_1 \geq 0] \neq \mathbb{1}[z \cdot v_2 \geq 0]] = \frac{\theta(v_1, v_2)}{\pi}.$$

We extend the above argument to the strategic setting.

**Lemma 6.** *Consider the prediction rule of [Algorithm 2](#) for unit-sized vectors  $v_1$  and  $v_2$ .  $|\text{err}(h_{v_1}) - \text{err}(h_{v_2})| \leq \frac{\theta(v_1, v_2)}{\pi}$ .*

*Proof.* The prediction rule for  $v_i$  is 1 iff  $v_i \cdot x - 1/c \geq 0$ . Consider an arbitrary example  $z$  with its utility maximizing action  $x$  with respect to prediction rule  $v_i$ . By [Corollary 4](#), the set of  $z$  classified as positive or negative under the rule  $v_i \cdot z \geq 0$  in the non-strategic setting exactly matches the set classified as positive or negative under  $v_i \cdot x \geq 1/c$  in the strategic setting, respectively. Invoking [Lemma 5](#) for the nonstrategic setting gives the difference in error in the strategic setting as well as  $\theta(v_1, v_2)/\pi$ .  $\square$

## B Proof of [Theorem 2](#)

We provide the proof of our main result, [Theorem 2](#) in this section.

As shown in [Corollary 4](#), the prediction rule identified by  $v_i$  in the strategic setting using adjusted threshold  $1/c$ , predicts exactly the same as  $v_i$  in the nonstrategic setting. Therefore, intuitively, the

key remaining part to extend the guarantees is to show that the *update rule* in our setting (strategic agents and arbitrary-sized vectors  $\mathbf{z}$  from the uniform distribution).

The update rule of our algorithm only uses negatively classified observed examples. Using [Lemma 3](#) for these examples  $\mathbf{z} = \mathbf{x}$ .

**Corollary 7.** *For any negatively classified example at time  $t$ , i.e.,  $\mathbf{x}_t \cdot \mathbf{v}_t < 1/c$ , the observed attributes are the same as the true attributes, i.e.,  $\mathbf{x}_t = \mathbf{z}_t$  and  $\mathbf{z}_t \cdot \mathbf{v}_t < 0$ . Furthermore, such examples are distributed uniformly according to  $D$  subject to  $\mathbf{z}_t \cdot \mathbf{v}_t < 0$  and satisfy the  $\nu$  bounded separability.*

The above lemma implies that the strategic aspect does not affect the prediction step.

Next, we show that using our update rule induces a coupling between examples inside the unit sphere and those on its surface.

**Lemma 8.** *Consider the update rule  $\mathbf{w}_{t+1} \leftarrow \mathbf{w}_t + 2(\mathbf{w}_t \cdot \hat{\mathbf{x}}_t)\hat{\mathbf{x}}_t$ , where  $\mathbf{x}_t$  is sampled from distribution  $D$  conditioned on  $-b \leq \mathbf{w}_t \cdot \hat{\mathbf{x}}_t \leq \frac{-b}{2}$ . The distribution over updated vectors  $\mathbf{w}_{t+1}$  matches that of the update rule  $\mathbf{w}_{t+1} \leftarrow \mathbf{w}_t + 2(\mathbf{w}_t \cdot \mathbf{x}_t)\mathbf{x}_t$ , where  $\mathbf{x}_t$  is sampled uniformly from the  $\|\mathbf{x}\| = 1$  conditioned on  $-b \leq \mathbf{w}_t \cdot \mathbf{x}_t \leq \frac{-b}{2}$ .*

*Proof.* We construct a coupling between the samples used in the two update rules. Fix a unit vector  $\hat{\mathbf{x}}$  with  $\|\hat{\mathbf{x}}\| = 1$ , and consider the set of points  $\mathbf{x}$  such that  $\mathbf{x}/\|\mathbf{x}\| = \hat{\mathbf{x}}$ . Under the distribution  $D$  (uniform over the unit ball), the density over such  $\mathbf{x}$  induces a uniform distribution over directions  $\hat{\mathbf{x}}$  on the unit sphere.

Since the update rule using  $\hat{\mathbf{x}}$  depends only on the direction of  $\mathbf{x}$  (and not its norm), and since every  $\mathbf{x}$  whose unit-sized scaled version is  $\hat{\mathbf{x}}$  yields the same update vector, the two update distributions are equivalent. That is, sampling from  $D$  and normalizing before updating yields the same distribution over  $\mathbf{w}_{t+1}$  as sampling directly from the unit sphere and updating without normalization.  $\square$

By [Corollary 7](#) and [Lemma 8](#), we can disregard the effects of strategic behavior and the arbitrary norms of the examples, and directly apply the guarantees established in the non-strategic setting:

**Theorem 9** (Adapted from [\[Yan and Zhang, 2017\]](#), Theorem 3). *Suppose [Algorithm 1](#) has inputs satisfying the  $\nu$ -bounded inseparability condition with respect to halfspace  $\mathbf{u}$ , initial halfspace  $\mathbf{v}_0$  such that  $\theta(\mathbf{v}_0, \mathbf{u}) \leq \pi/2$ , target error  $\varepsilon$ , confidence  $\delta$ , sample schedule  $\{m_k\}$  where  $m_k = \Theta(d(\ln d + \ln \frac{k}{\delta}))$ , and band width  $\{b_k\}$  where  $b_k = \Theta(\frac{2^{-k}}{\sqrt{d \ln(km_k/\delta)}})$ . Additionally,  $\nu \leq \Theta(\frac{\varepsilon}{\ln d + \ln \ln \frac{1}{\varepsilon} + \ln \frac{1}{\delta}})$ . Then with probability at least  $1 - \delta$ :*

1. The output halfspace  $\mathbf{v}$  outputs a prediction different from  $\mathbf{u}$  with probability at most  $\varepsilon$ .
2. The number of label queries is  $O(d \ln \frac{1}{\varepsilon} \cdot (\ln d + \ln \frac{1}{\delta} + \ln \ln \frac{1}{\varepsilon}))$ .
3. The number of unlabeled examples drawn is  $O(d \cdot (\ln d + \ln \frac{1}{\delta} + \ln \ln \frac{1}{\varepsilon})^2 \cdot \frac{1}{\varepsilon} \ln \frac{1}{\varepsilon})$ .
4. The algorithm runs in time  $O(d^2 \cdot (\ln d + \ln \frac{1}{\delta} + \ln \ln \frac{1}{\varepsilon})^2 \cdot \frac{1}{\varepsilon} \ln \frac{1}{\varepsilon})$ .

**Lemma 10** (Adapted from [\[Yan and Zhang, 2017\]](#), Lemma 3). *Suppose [Algorithm 2](#) has inputs satisfying the  $\nu$ -bounded inseparability condition with respect to halfspace  $\mathbf{u}$ , initial halfspace  $\mathbf{w}_0$  and angle upper bound  $\theta \in (0, \pi/2]$  such that  $\theta(\mathbf{w}_0, \mathbf{u}) \leq \theta$ , confidence  $\delta$ , number of iterations  $m = \Theta(d(\ln d + \ln \frac{1}{\delta}))$ , and band width  $b = \Theta(\frac{\theta}{\sqrt{d \ln(m/\delta)}})$ . Additionally,  $\nu = O(\frac{\theta}{\ln(m/\delta)})$ . Then with probability at least  $1 - \delta$ :*

1. The output  $\mathbf{w}_m$  is such that  $\theta(\mathbf{w}_m, \mathbf{u}) \leq \frac{\theta}{2}$ .
2. The number of label queries is  $O(d \cdot (\ln d + \ln \frac{1}{\delta}))$ .
3. The number of unlabeled examples drawn is  $O(d \cdot (\ln d + \ln \frac{1}{\delta})^2 \cdot \frac{1}{\theta})$ .
4. The algorithm runs in time  $O(d^2 \cdot (\ln d + \ln \frac{1}{\delta})^2 \cdot \frac{1}{\theta})$ .

The only remaining part is proving the mistake bound of the algorithm.

**Lemma 11.** *Suppose [Algorithm 1](#) has inputs satisfying the  $\nu$ -bounded inseparability condition with respect to halfspace  $\mathbf{u}$ , initial halfspace  $\mathbf{v}_0$  such that  $\theta(\mathbf{v}_0, \mathbf{u}) \leq \pi/2$ , target error  $\varepsilon$ ,*

confidence  $\delta$ , sample schedule  $\{m_k\}$  where  $m_k = \Theta(d(\ln d + \ln \frac{k}{\delta}))$ , and band width  $\{b_k\}$  where  $b_k = \Theta(\frac{2^{-k}}{\sqrt{d \ln(km_k/\delta)}})$ . Additionally,  $\nu \leq \Theta(\frac{\varepsilon}{\ln d + \ln \ln \frac{1}{\varepsilon} + \ln \frac{1}{\delta}})$ . Then with probability at least  $1 - \delta$ , The additional number of mistakes that the algorithm makes compared to  $\mathbf{u}$  is  $O(d \cdot \ln \frac{1}{\varepsilon} \cdot (\ln d + \ln \frac{1}{\delta} + \ln \ln \frac{1}{\varepsilon})^2)$ .

*Proof.* Similar to the proof of Theorem 3 in [Yan and Zhang, 2017], we define, for each iteration  $k$ , a corresponding event with high individual success probability. Specifically, by Lemma 10, for every  $k$ , there exists an event  $E_k$  such that  $\Pr(E_k) \geq 1 - \frac{\delta}{k(k+1)}$ . Moreover, on event  $E_k$ , items 1 through 4 of Lemma 10 hold for the input  $\mathbf{w}_0 = \mathbf{v}_k$ .

The excess error of  $\mathbf{w}_t$  relative to  $\mathbf{u}$  is  $\theta_t/\pi$ , where  $\theta_t$  is the angle between  $\mathbf{w}_t$  and  $\mathbf{u}$ . Consider Algorithm 2 with initial halfspace  $\mathbf{w}_0$  and angle bound  $\theta \in [0, \frac{\pi}{2}]$  such that  $\theta(\mathbf{w}_0, \mathbf{u}) \leq \theta$ . Let the number of iterations be  $m = \Theta(\frac{d}{(1-2\eta)^2} (\ln \frac{d}{(1-2\eta)^2} + \ln \frac{k}{\delta}))$ . Then, with probability at least  $1 - \frac{\delta}{k(k+1)}$ , the output halfspace  $\mathbf{w}_m$  satisfies  $\theta(\mathbf{w}_m, \mathbf{u}) \leq \frac{\theta}{2}$ .

By items 2 and 3 in Lemma 10, with probability at least  $1 - \frac{\delta}{k(k+1)}$ , the total number of examples seen during epoch  $k$  is:  $O(d \cdot (\ln d + \ln \frac{k}{\delta})^2 \cdot \frac{1}{\theta_t})$ . Since each example differs in classification from  $\mathbf{u}$  with probability  $\frac{\theta}{\pi}$ , the number of additional misclassified examples compared to  $\mathbf{u}$  is  $O(d \cdot (\ln d + \ln \frac{k}{\delta})^2)$ . The number of total time epochs,  $k_0 = \lceil \log_2(1/\varepsilon) \rceil$  and  $k \leq k_0$ . The total number of epochs is  $k_0 = \lceil \log_2(1/\varepsilon) \rceil$ , and we have  $k \leq k_0$ . Therefore, by a union bound over all epochs, with probability at least  $1 - \delta$ , the total number of additional mistakes compared to  $\mathbf{u}$  is  $O(d \cdot \ln \frac{1}{\varepsilon} \cdot (\ln d + \ln \frac{1}{\delta} + \ln \ln \frac{1}{\varepsilon})^2)$ .

583 □

**Theorem 2.** Suppose Algorithm 1 has inputs satisfying the  $\nu$ -bounded inseparability condition with respect to halfspace  $\mathbf{u}$ , initial halfspace  $\mathbf{v}_0$  such that  $\theta(\mathbf{v}_0, \mathbf{u}) \leq \pi/2$ , target error  $\varepsilon$ , confidence  $\delta$ , sample schedule  $\{m_k\}$  where  $m_k = \Theta(d(\ln d + \ln \frac{k}{\delta}))$ , and band width  $\{b_k\}$  where  $b_k = \Theta(\frac{2^{-k}}{\sqrt{d \ln(km_k/\delta)}})$ . Additionally,  $\nu \leq \Theta(\frac{\varepsilon}{\ln d + \ln \ln \frac{1}{\varepsilon} + \ln \frac{1}{\delta}})$ . Then with probability at least  $1 - \delta$ :

1. The output halfspace  $\mathbf{v}$  outputs a prediction different from  $\mathbf{u}$  with probability at most  $\varepsilon$ .
2. The number of label queries is  $O(d \ln \frac{1}{\varepsilon} \cdot (\ln d + \ln \frac{1}{\delta} + \ln \ln \frac{1}{\varepsilon}))$ .
3. The number of unlabeled examples drawn is  $O(d \cdot (\ln d + \ln \frac{1}{\delta} + \ln \ln \frac{1}{\varepsilon})^2 \cdot \frac{1}{\varepsilon} \ln \frac{1}{\varepsilon})$ .
4. The additional number of mistakes that the algorithm makes compared to  $\mathbf{u}$  is  $O(d \cdot \ln \frac{1}{\varepsilon} \cdot (\ln d + \ln \frac{1}{\delta} + \ln \ln \frac{1}{\varepsilon})^2)$ .
5. The algorithm runs in time  $O(d^2 \cdot (\ln d + \ln \frac{1}{\delta} + \ln \ln \frac{1}{\varepsilon})^2 \cdot \frac{1}{\varepsilon} \ln \frac{1}{\varepsilon})$ .

*Proof.* Corollary 7, Lemma 8 and Theorem 9 imply items 1, 2, 3, and 5. Lemma 11 implies item 4. □

## 596 C Initialization Step

Algorithm 1 assumes that the initial vector  $\mathbf{v}_0$  forms an angle less than  $\pi/2$  with the true separator  $\mathbf{u}$ . To obtain such a vector, we adopt an approach similar to that of [Yan and Zhang, 2017]. Intuitively, Algorithm 3 begins with two opposite vectors and, after a small number of trials, selects the one with lower classification error. This initialization step incurs only a constant overhead in terms of label, time, and mistake complexities.

---

**Algorithm 3:** Master Algorithm in Adversarial Noise Setting, (adapted from [Yan and Zhang \[2017\]](#))

---

**Input:** Labeling oracle  $\mathcal{O}$ , confidence  $\delta$ .

**Output:** A halfspace  $\mathbf{v}$  such that  $\theta(\hat{\mathbf{v}}, \mathbf{u}) \leq \pi/4$ .

$\mathbf{v}_0 \leftarrow (1, 0, \dots, 0)$ .

$\mathbf{v}_+ \leftarrow \text{Active-Strategic-Perceptron}(\mathcal{O}, \mathbf{v}_0, \frac{1}{16}, \frac{\delta}{3}, \{m_k\}, \{b_k\}, \{c\})$ .

602  $\mathbf{v}_- \leftarrow \text{Active-Strategic-Perceptron}(\mathcal{O}, -\mathbf{v}_0, \frac{1}{16}, \frac{\delta}{3}, \{m_k\}, \{b_k\}, \{c\})$ .

Define region  $R := \{\mathbf{x} : \text{sgn}(\mathbf{v}_+ \cdot \mathbf{x} - 1/c) \neq \text{sgn}(\mathbf{v}_- \cdot \mathbf{x} - 1/c)\}$ .

$S \leftarrow \text{Observe } 8 \ln \frac{6}{\delta} \text{ examples in } R \text{ and query their labels.}$

**if**  $\text{err}_S(h_{\mathbf{v}_+}) \leq \text{err}_S(h_{\mathbf{v}_-})$  **then**

| **return**  $\mathbf{v}_+$ .

| **else**

| **return**  $\mathbf{v}_-$ .

---

603 By [Corollary 7](#) and [Theorem 2](#), we can effectively disregard the strategic behavior of agents and  
 604 apply Theorem 12 from [Yan and Zhang \[2017\]](#), which implies the following.

605 **Theorem 12.** Suppose [Algorithm 3](#) has inputs labeling oracle  $\mathcal{O}$  that satisfies  $\nu$ -inseparability  
 606 condition with respect to  $\mathbf{u}$ , confidence  $\delta$ , and sample schedule  $\{m_k\}$  where

$$m_k = \Theta \left( d \left( \ln d + \ln \frac{k}{\delta} \right) \right),$$

607 and band width  $\{b_k\}$  where

$$b_k = \tilde{\Theta} \left( \frac{2^{-k}}{\sqrt{d}} \right).$$

608 Then, with probability at least  $1 - \delta$ , the output  $\hat{\mathbf{v}}$  is such that  $\theta(\hat{\mathbf{v}}, \mathbf{u}) \leq \frac{\pi}{4}$ . Furthermore:

- 609 1. the total number of label queries to oracle  $\mathcal{O}$  is at most  $\tilde{O}(d)$ ;
- 610 2. the total number of unlabeled examples drawn is  $\tilde{O}(d)$ ;
- 611 3. the total number of additional mistakes compared to  $\mathbf{u}$  is  $\tilde{O}(d)$ ;
- 612 4. the algorithm runs in time  $\tilde{O}(d^2)$ .
